# Supplementary material for: The biofilm inhibitor Carolacton inhibits planktonic growth of virulent pneumococci via a conserved target
Source: PubMed Central journal article supplement (PMC4939601; doi:10.1038/srep29677), 2016-07-11
Supplement: srep29677-s1.pdf [file srep29677-s1.pdf]

## Supplementary Information

### **The biofilm inhibitor Carolacton inhibits planktonic growth of virulent pneumococci via a conserved target**

Jannik Donner<sup>1\*</sup>, Michael Reck<sup>1</sup>, Simone Bergmann<sup>2</sup>, Andreas Kirschning<sup>3</sup>, Rolf Müller<sup>4</sup>, and Irene Wagner-Döbler<sup>1</sup>

<sup>1</sup>Department of Medical Microbiology, Group Microbial Communication, Helmholtz Centre for Infection Research, Braunschweig, Germany

<sup>2</sup>Institute of Microbiology, Technische Universität Braunschweig, Braunschweig, Germany

<sup>3</sup>Institute of Organic Chemistry and Center of Biomolecular Drug Research (BMWZ), Leibniz Universität Hannover, Hannover, Germany

<sup>4</sup>Department of Microbial Natural Products, Helmholtz Institute for Pharmaceutical Research Saarland (HIPS), Helmholtz Centre for Infection Research and Pharmaceutical Biotechnology, Saarland University, Saarbrücken, Germany.

\*Corresponding author: Jannik Donner, [jannik.donner@helmholtz-hzi.de](mailto:jannik.donner@helmholtz-hzi.de)

## Supplementary Figures and Tables

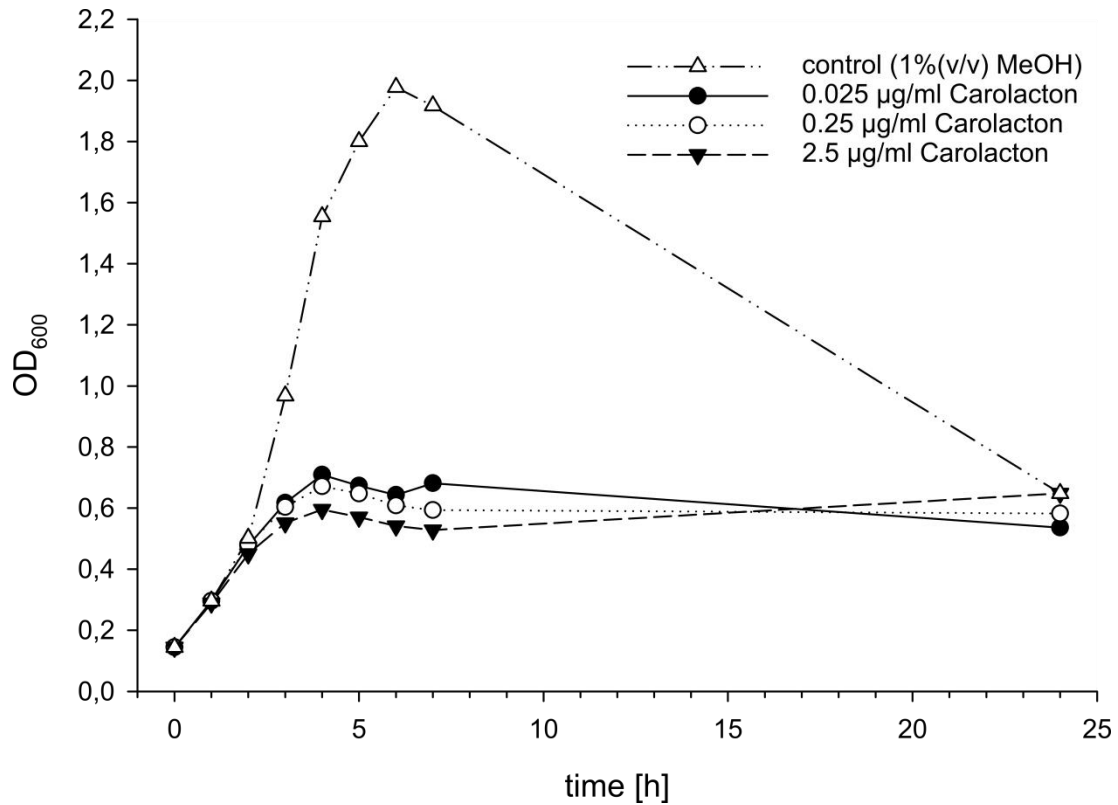

**Supplementary Figure S1. Concentration-independent growth-inhibition of *S. pneumoniae* TIGR4 by Carolacton.** Shown are the growth-response curves for cells that were grown with 2.5, 0.25 and 0.025 µg/ml Carolacton, corresponding to 53, 5.3 and 0.53 µM, respectively. The shown Supplementary Figure is representative for three independent biological replicates.

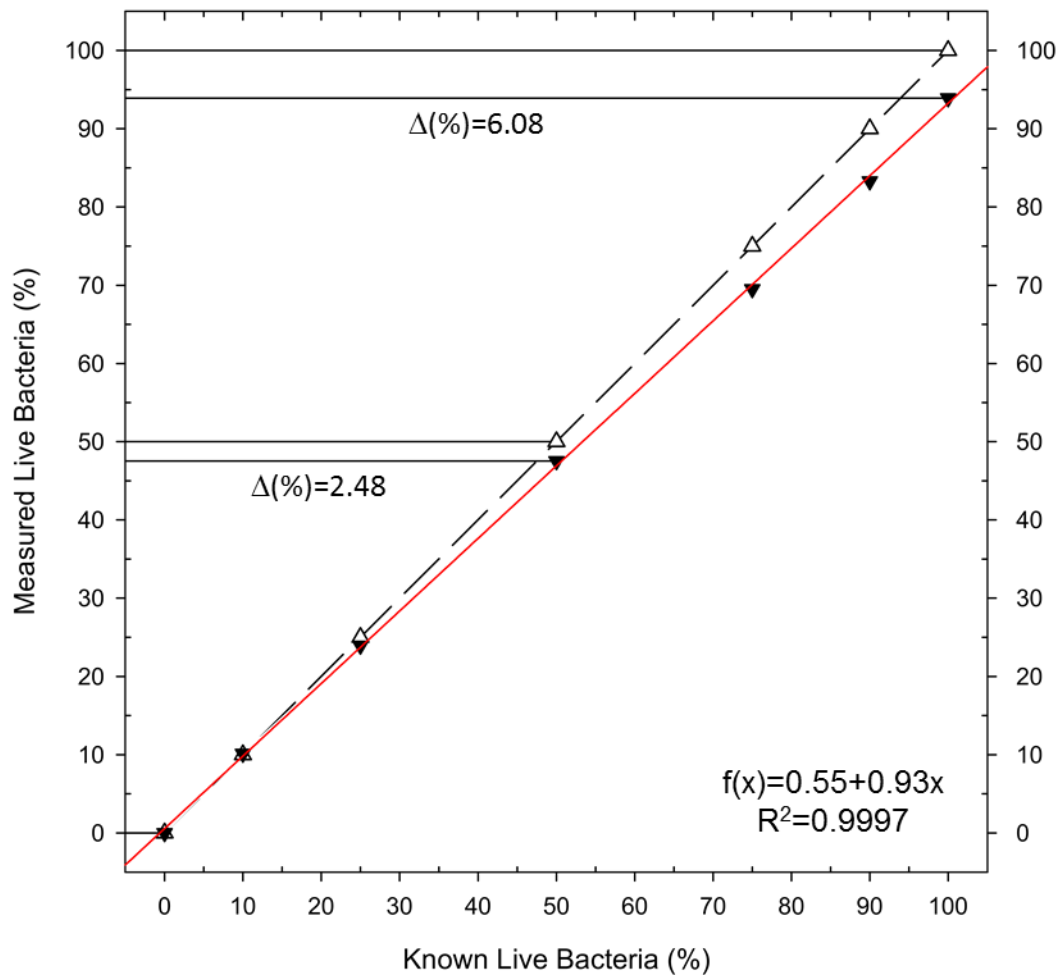

**Supplementary Figure S2. Assessment of applicability of Syto 9/PI staining for quantification of membrane damage of *S. pneumoniae* TIGR4 by flow cytometry.** Heat-killed *S. pneumoniae* TIGR4 cells, were mixed with live cells obtained from exponentially growing culture in different ratios, stained with Syto 9/PI and analysed via flow cytometry (black triangles). A linear regression analysis was used to draw a trend line (red line,  $f(x)$ ),  $R^2=0.9997$ ), clearly indicating a close linear relationship between the data points. The calculated least squares fit was further extrapolated to the point containing 100% live bacteria (white triangles), suggesting a maximum of 6.08% dead cells in the 100% live population.

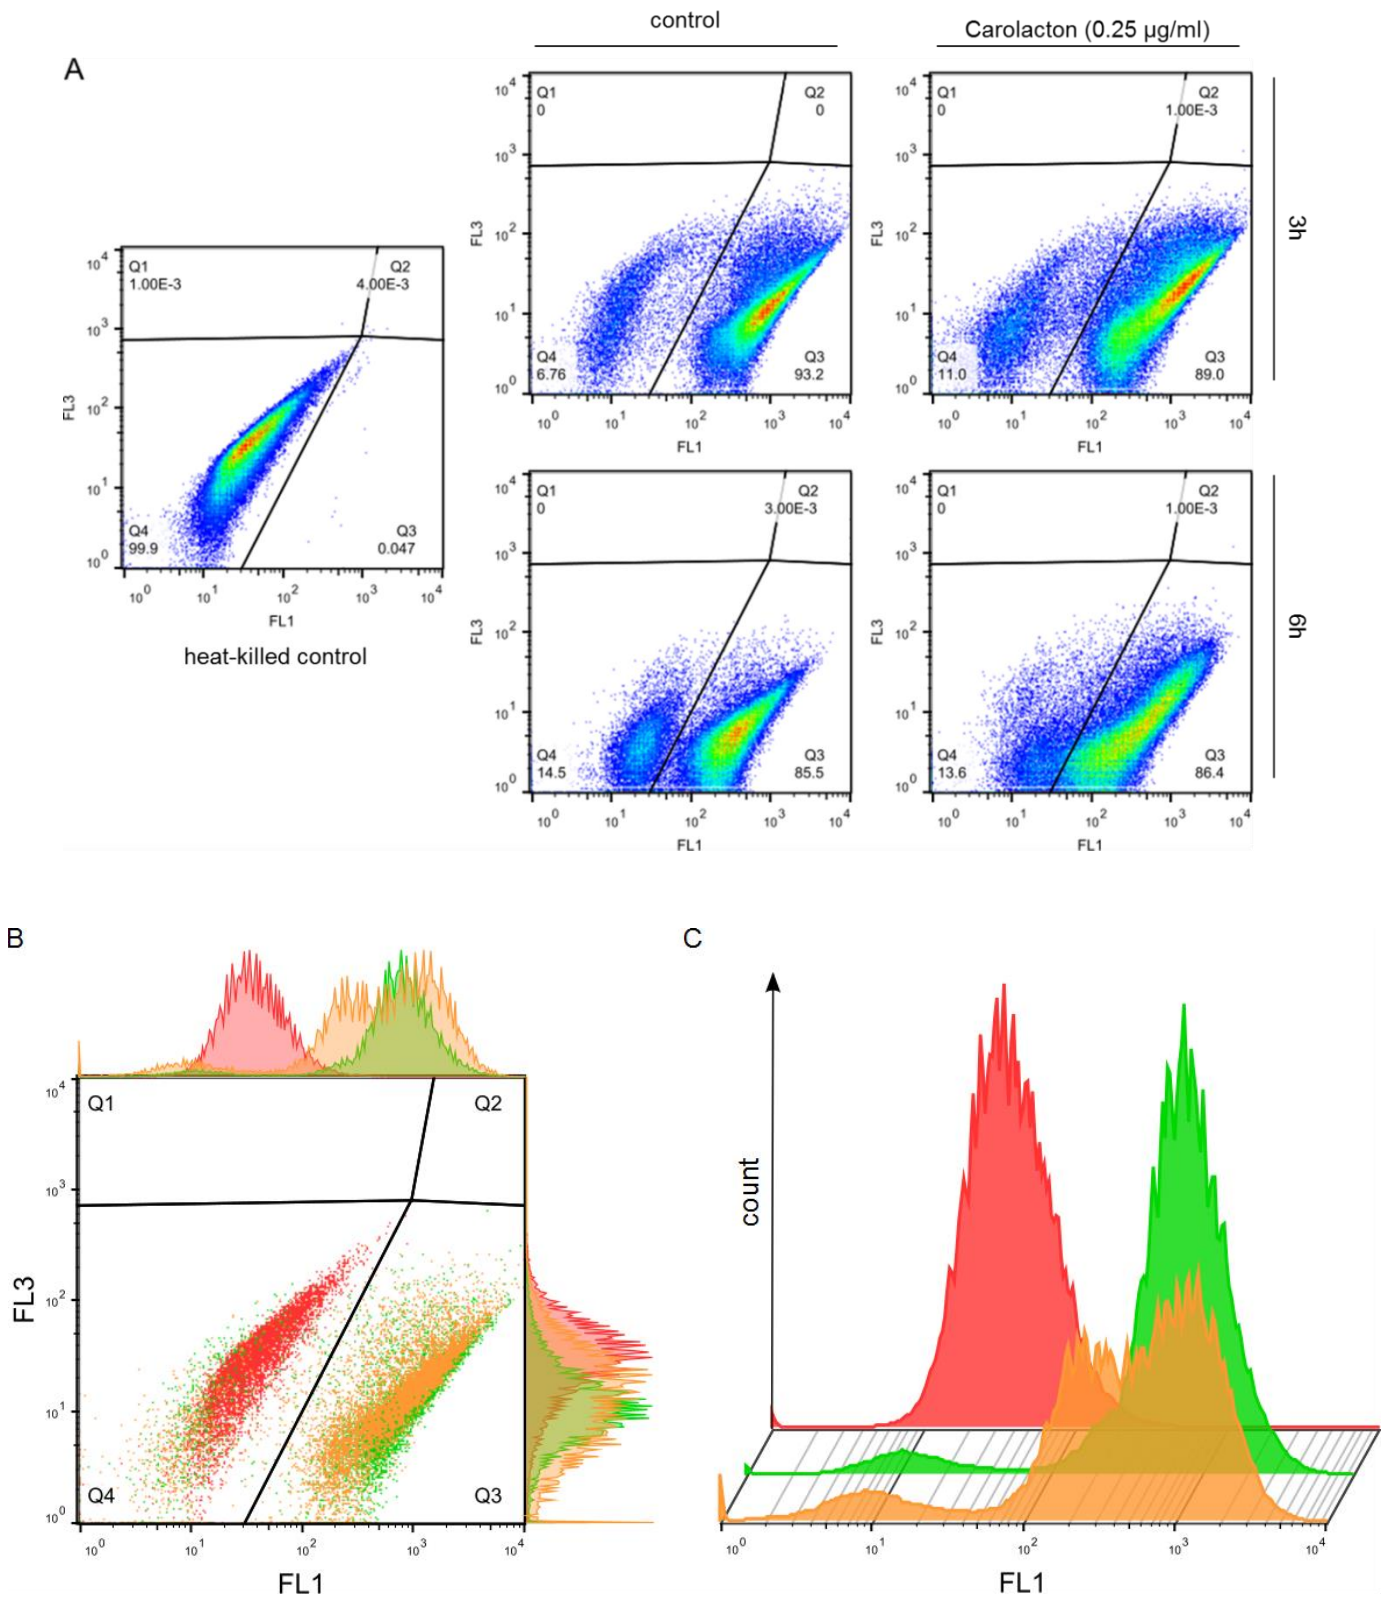

**Supplementary Figure S3. Flow cytometric analysis of Syto 9/PI-stained cells grown with Carolacton.** (A) Shown are dot plots of Syto 9/PI-stained *S. pneumoniae* TIGR4 cells after 3h

and 6h of growth with 0.25  $\mu\text{g/ml}$  Carolacton and a control. Syto 9/PI-stained heat-killed cells were used to identify the dead population (bottom left). The percentages of cells identified in the different quadrants of the plots (Q1-4) are shown in the respective corners. **(B)** Example of the shift in recorded fluorescence intensities (FL1/FL3) of Carolacton (0.25  $\mu\text{g/ml}$ )-treated and Syto 9/PI-stained cells after 3h. Colouring: green (untreated control); orange (Carolacton-treated); red (heat-killed cells). **(C)** Exemplary histogram of recorded green fluorescence (FL1) intensities versus relative cell count of *S. pneumoniae* TIGR4 cells after 3h. Colouring as shown in (B). The figure stands representative for three independent experiments.

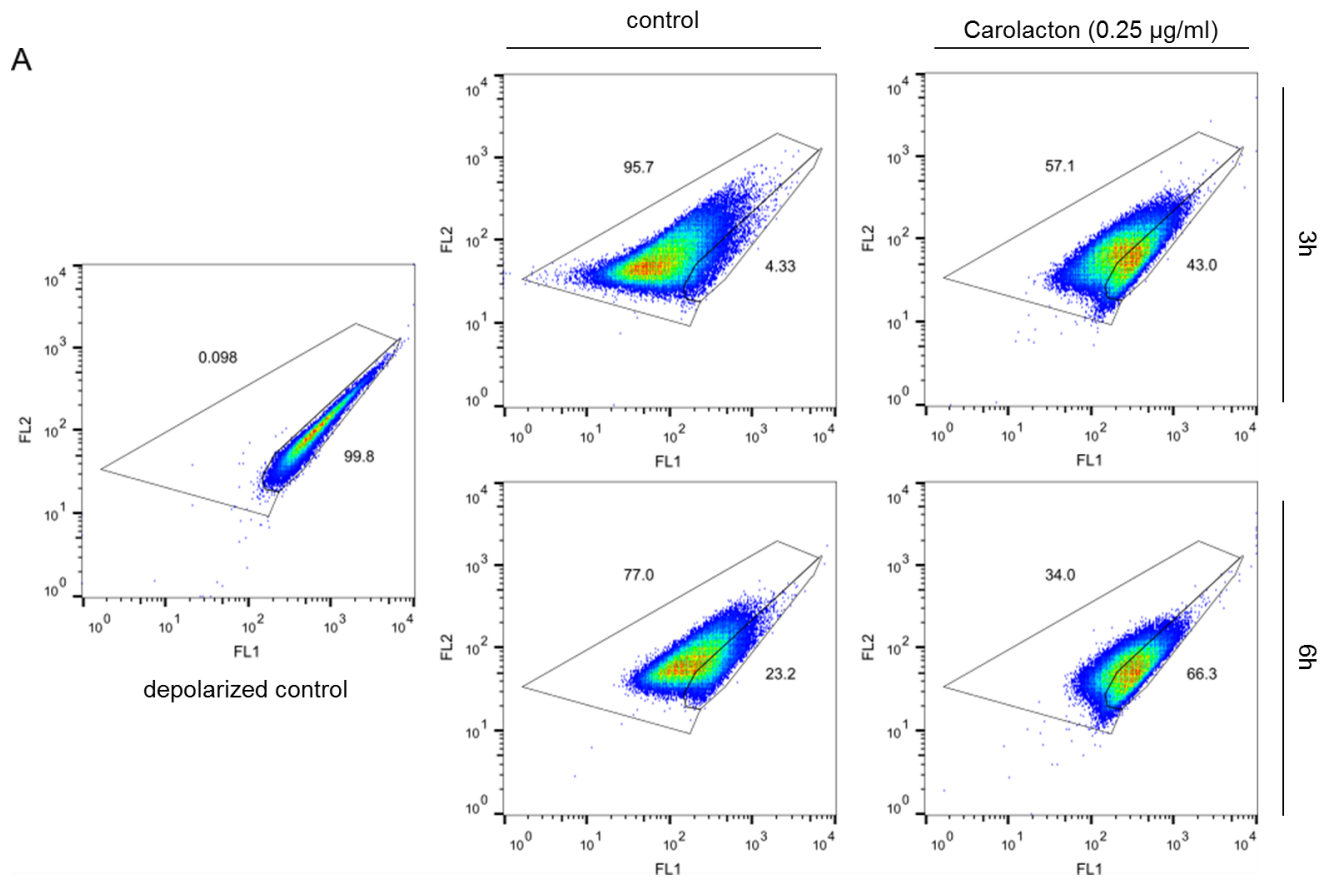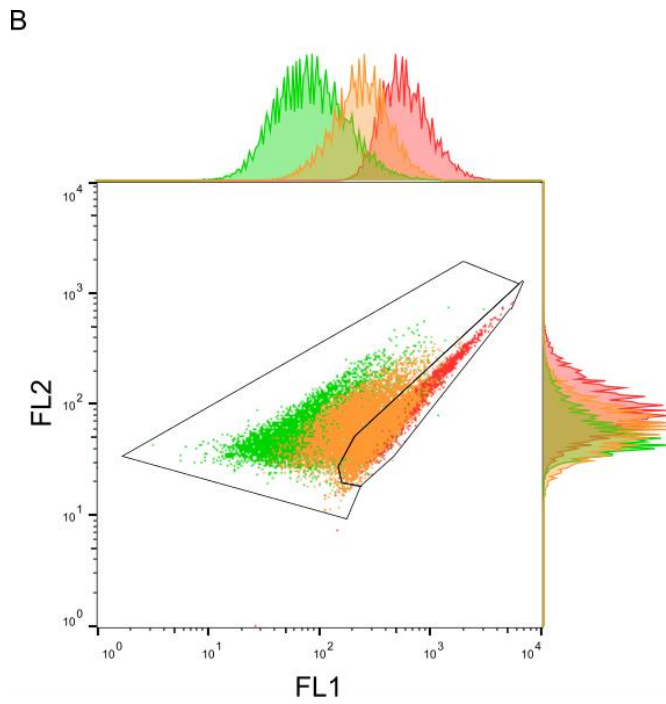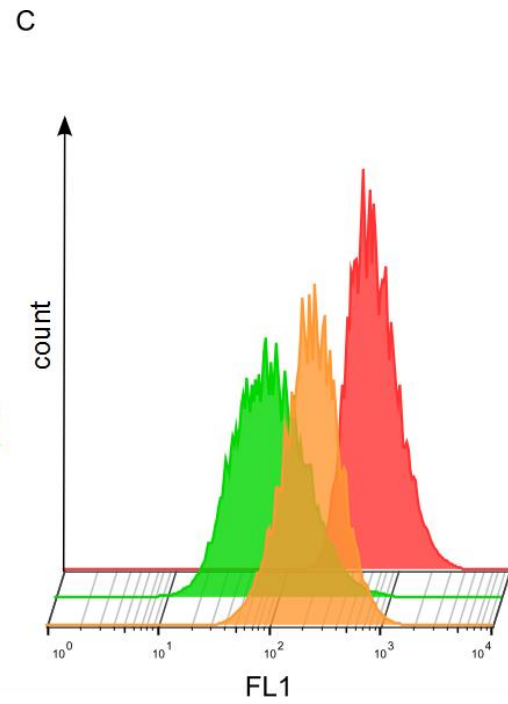

**Supplementary Figure S4. Flow cytometric analysis of DiOC<sub>2</sub>(3)-stained cells grown with Carolacton.** (A) Shown are dot plots of DiOC<sub>2</sub>(3)-stained *S. pneumoniae* TIGR4 cells after 3h

and 6h of growth with 0.25  $\mu\text{g/ml}$  Carolacton and a control. DiOC<sub>2</sub>(3)-stained heat-killed cells were used to identify the depolarized population (left). The percentages of cells identified in the different quadrants of the plots (Q1-4) are shown in the respective corners. **(B)** Example of the shift in recorded fluorescence intensities (FL1/FL2) of Carolacton (0.25  $\mu\text{g/ml}$ )-treated and DiOC<sub>2</sub>(3)-stained cells after 3h. Colouring: green (untreated control); orange (Carolacton-treated); red (heat-killed cells). **(C)** Histogram showing the recorded green fluorescence (FL1) intensities versus relative cell counts of *S. pneumoniae* TIGR4 cells after 3h. Colouring as shown in (B). The figure stands representative for three independent experiments.

**A**  
tRNAs

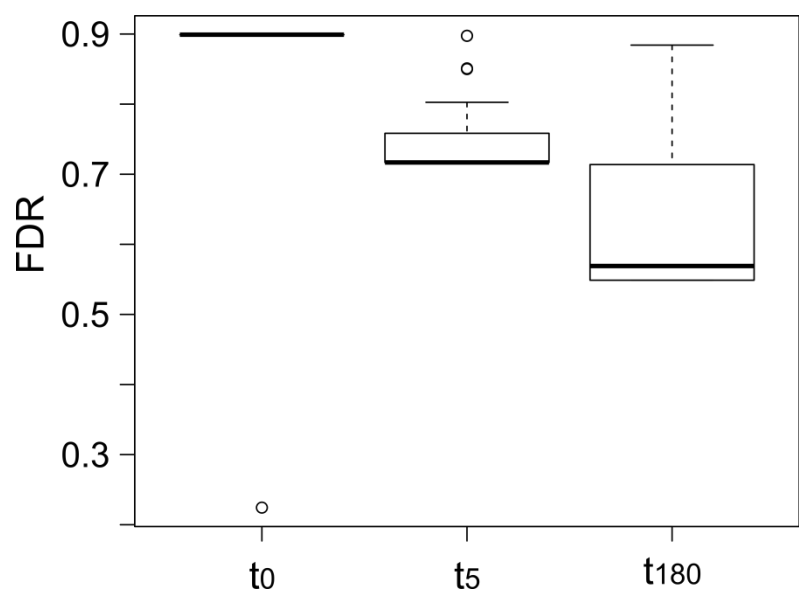

**B**  
sRNAs  $\leq 200$  nt

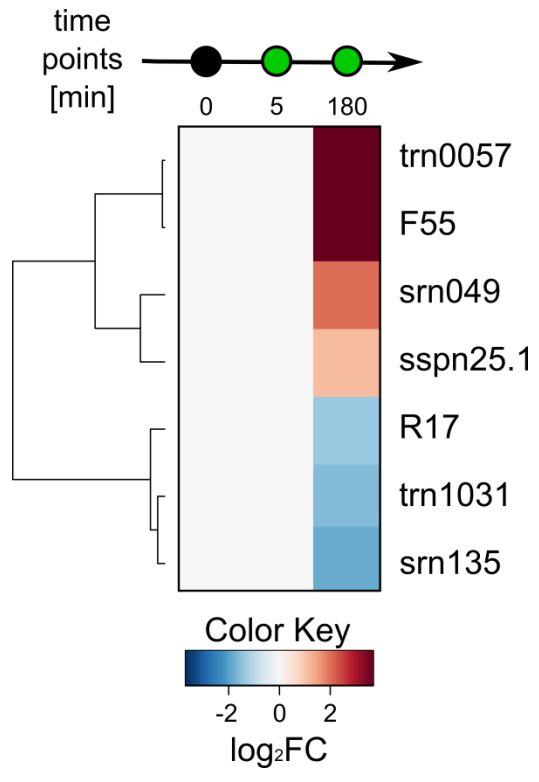



**C**  
sRNAs >200 nt

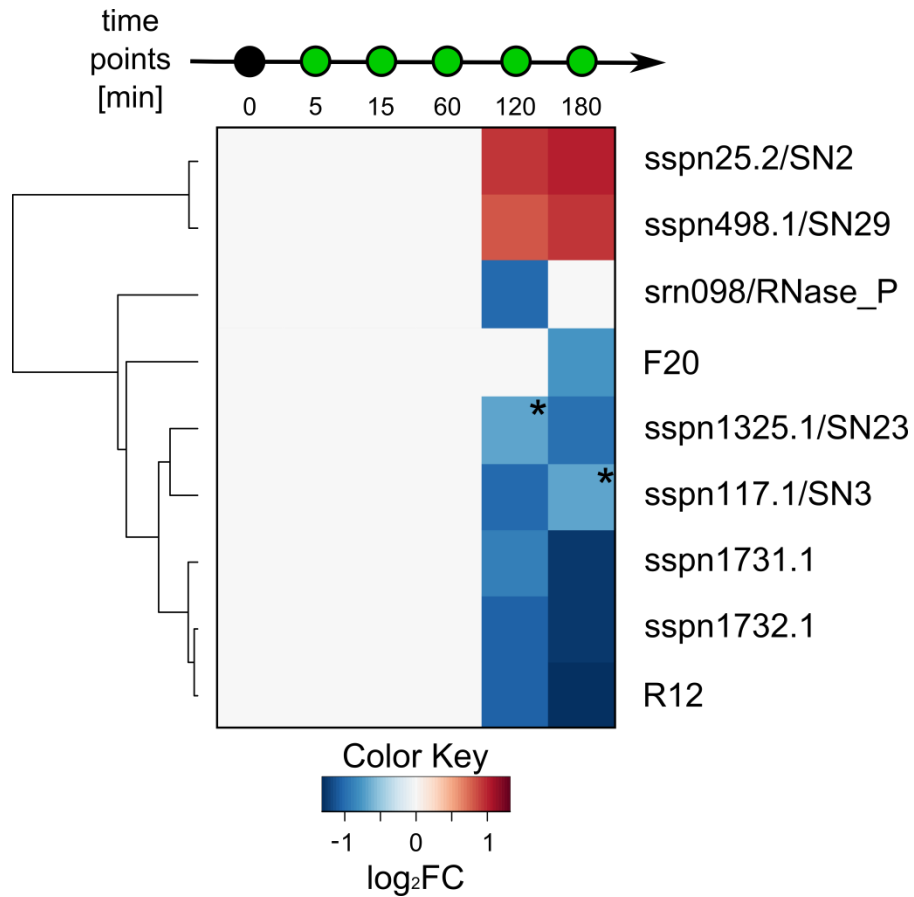

**D**  
mRNAs ≤200nt

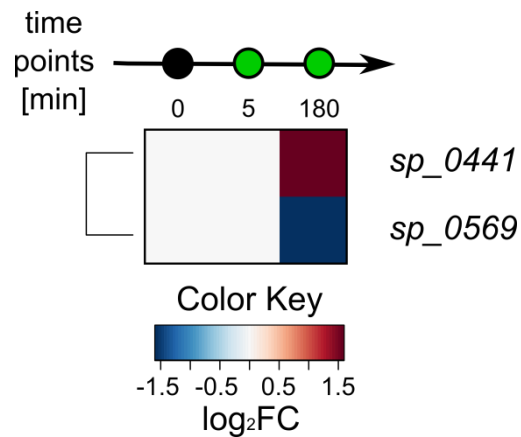

**Supplementary Figure S5. Analysis of different cellular RNA species of *S. pneumoniae* TIGR4 for differential expression after treatment with 0.25 µg/ml Carolacton. (A) Analysis of differential expression of tRNAs,  $\log_2FC \geq \pm 0.8$ ,  $FDR < 0.01$ . (B) Heat map of differentially**

regulated sRNAs  $\leq 200$  nt;  $\log_2FC \geq \pm 0.8$ ,  $FDR < 0.01$ ; “\*”=significant differentially regulated transcripts with  $FDR < 0.01$  but  $\log_2FC < \pm 0.8$ ,  $\log_2FC(SN23_{1120}) = -0.737$ ;  $\log_2FC(SN3_{1180}) = -0.735$ . **(C)** Differentially expressed small sRNAs ( $> 200$  nt),  $\log_2FC \geq \pm 0.8$ ,  $FDR < 0.01$ . **(D)** Differentially expressed small mRNAs ( $\leq 200$  nt),  $\log_2FC \geq \pm 0.8$ ,  $FDR < 0.01$ . White fields within heat maps indicate lack of significance ( $FDR > 0.01$ ) at this time point. Differential expression was calculated using the Bioconductor package edgeR for R.

**A**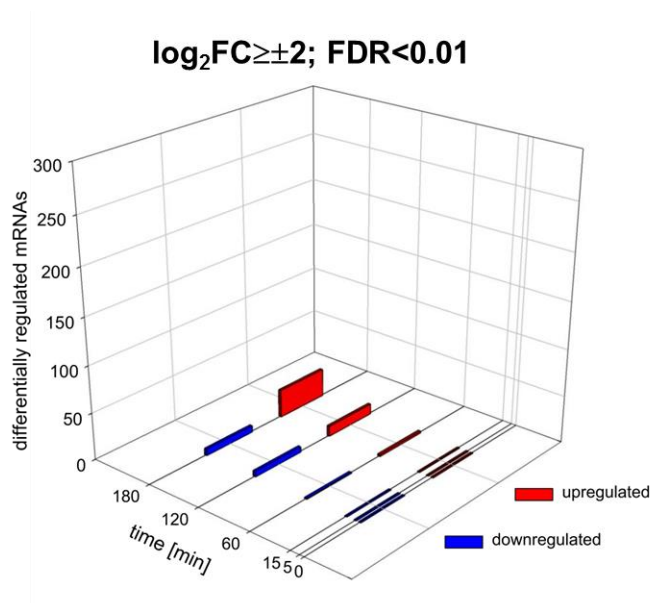**B**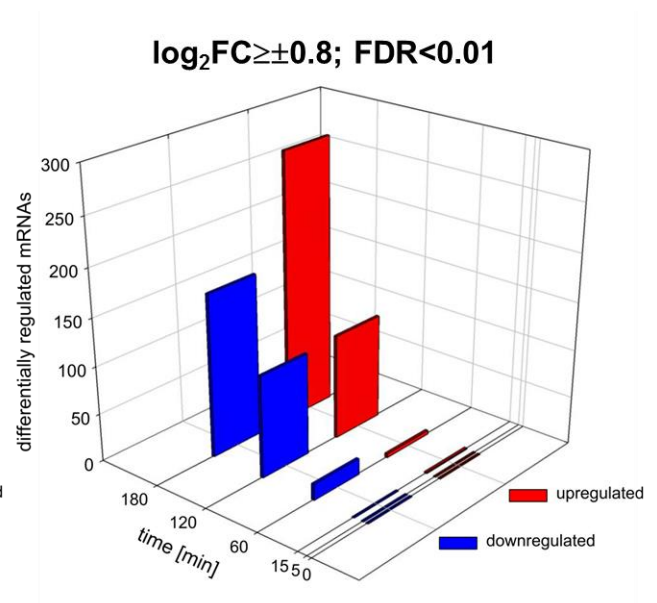

**Supplementary Figure S6. Total number of differentially regulated mRNAs after treatment of *S. pneumoniae* TIGR4 with Carolacton.** Comparison of the total number of all differentially regulated mRNAs during growth with 0.25  $\mu\text{g/ml}$  Carolacton at the indicated time points for different cut-offs of the  $\log_2FC$  change:  $\geq \pm 2$  (A) and  $\geq \pm 0.8$  (B).

**A**

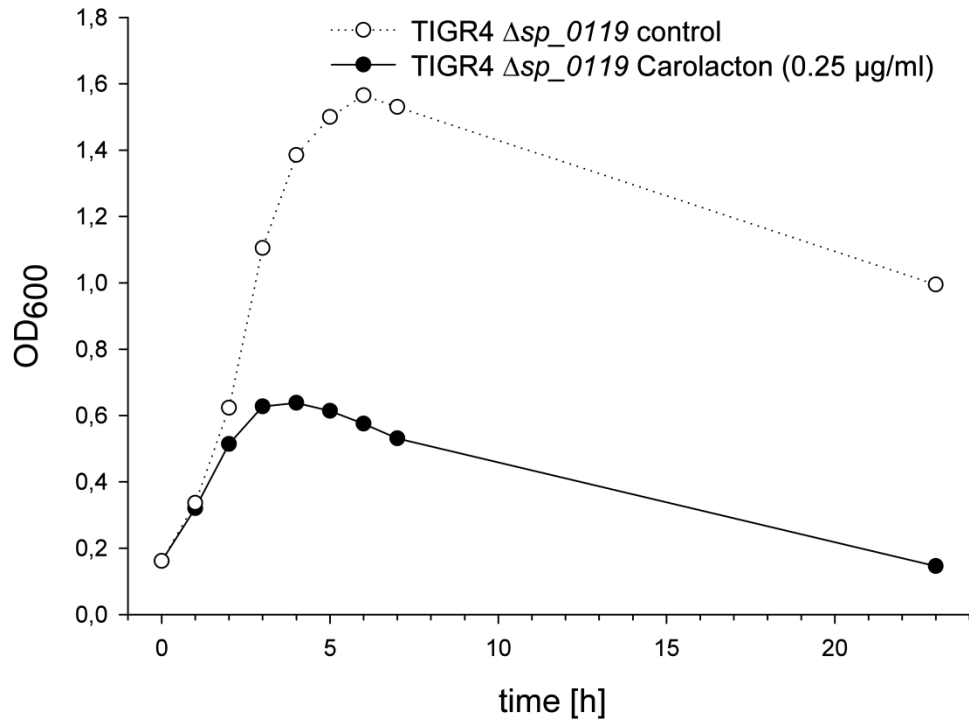

**B**

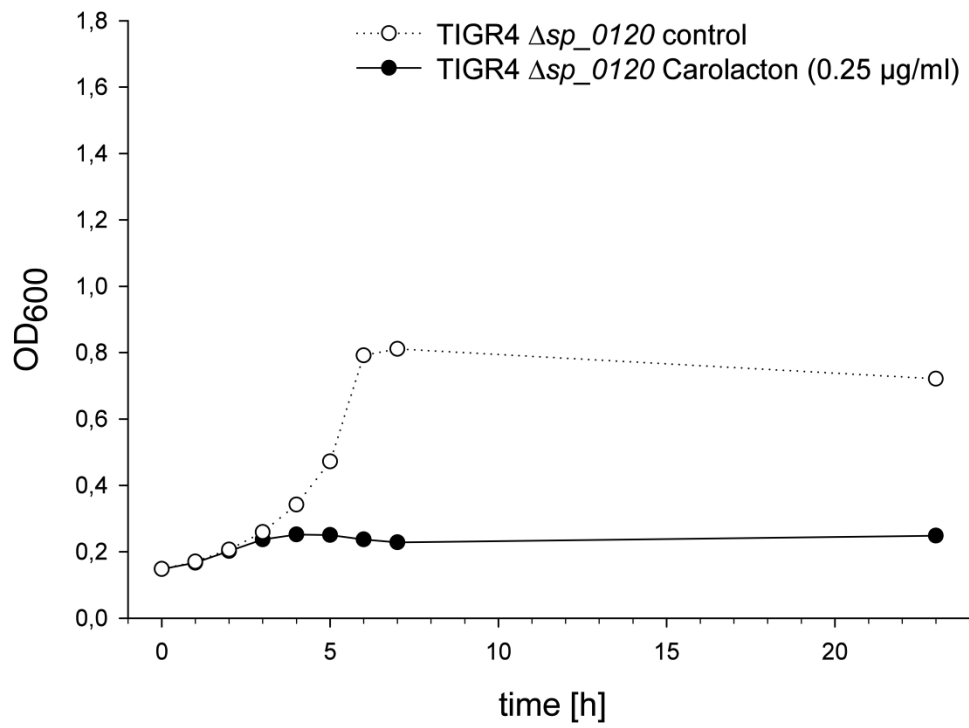

**C**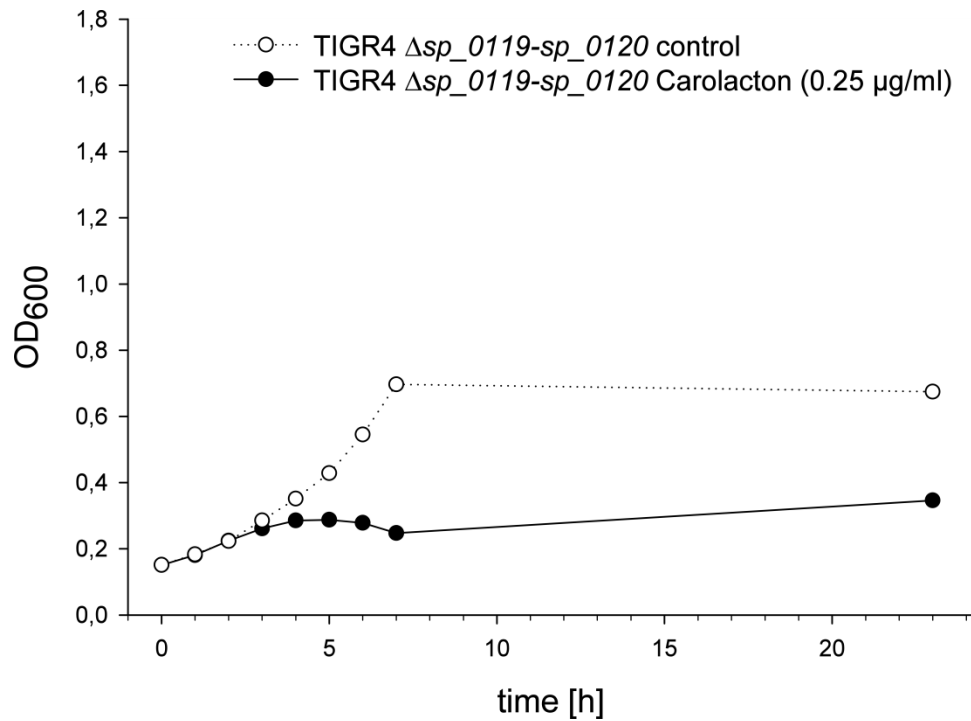

**Supplementary Figure S7. Growth response of *S. pneumoniae* TIGR4 *sp\_0119/sp\_0120* single deletion mutants and a *sp\_0119-sp\_0120* double deletion mutant to Carolacton.** Mutants were grown in THBY in the presence of 0.25  $\mu\text{g/ml}$  Carolacton. Single deletion mutants of *sp\_0119* (A) and *sp\_0120* (B), as well as the *sp\_0119-sp\_0120* double mutant (C), were inhibited by Carolacton. Deletion of *sp\_0120* resulted in a notable growth defect (B, C) when compared to the TIGR4 wild type (Supplementary Figure S1) or the *sp\_0119* k.o. mutant (A). The shown growth curves stand representative for three biological replicates.

**A**

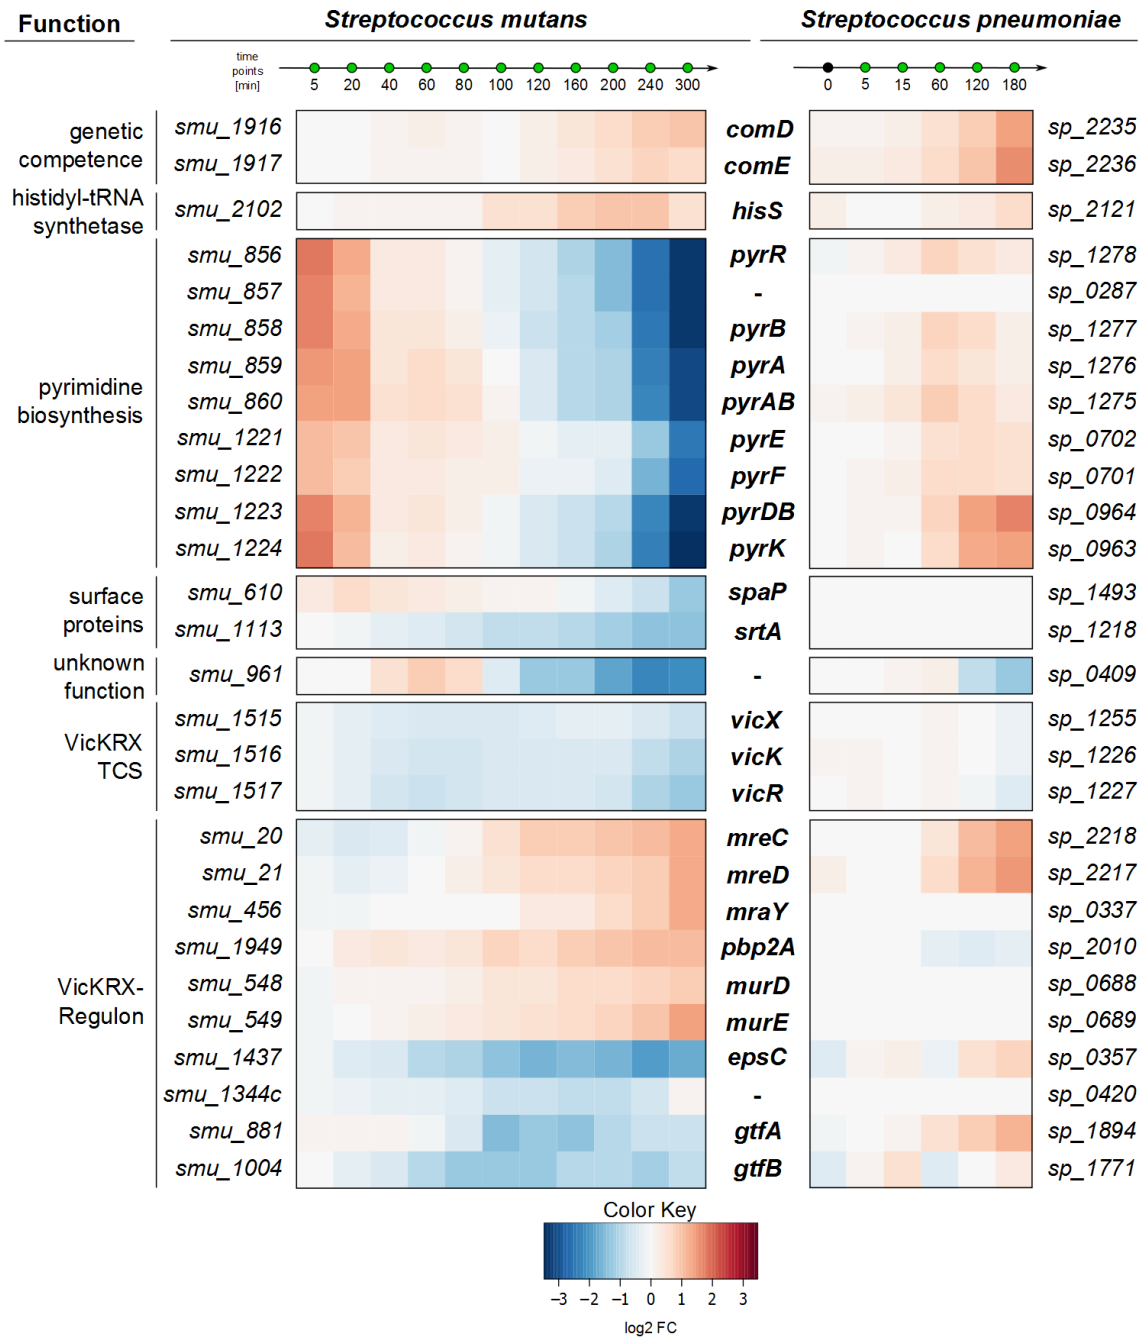

**B**

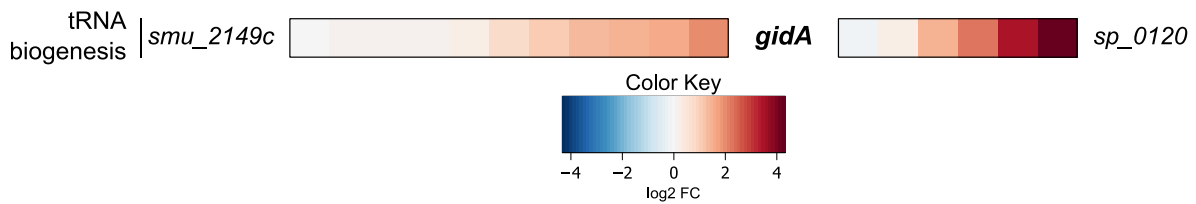

**Supplementary Figure S8. Heat map-comparison of differentially transcribed genes between *S. mutans* UA159 and *S. pneumoniae* TIGR4 upon treatment with Carolacton.** Data for differential gene expression of *S. mutans* was obtained from time-series microarray experiments conducted by Reck *et al.*<sup>1</sup>. *S. mutans*, as well as *S. pneumoniae* were treated with a final concentration of 0.25 µg/ml Carolacton. **(A)** Comparison of significant differentially regulated genes, operons and regulatory components in *S. mutans* grown with Carolacton (as described by Reck *et al.*, 2011) to Carolacton-treated *S. pneumoniae*. **(B)** Differential transcription of the *gidA*-transcript in *S. mutans*. GidA is the earliest and one of the most strongly upregulated transcripts in *S. pneumoniae* when grown with Carolacton. It is involved in biogenesis (formation of wobble 5-carboxymethylaminomethyluridine) of tRNAs.

**Supplementary Table S1. Characteristics and susceptibility of the tested clinical *S. pneumoniae* isolates of serotype 19A to antibiotics.**

| Isolate                      | Sero-type | Diagnosis            | Source             | Antimicrobial Agent                | MIC (µg/ml) | Interpretation <sup>a,b</sup> |
|------------------------------|-----------|----------------------|--------------------|------------------------------------|-------------|-------------------------------|
| Sp49<br>(NRZ:319<br>8/36486) | 19A       | pneumonia/<br>sepsis | blood              | Oxacillin <sup>#</sup>             | -           | resistant                     |
|                              |           |                      |                    | Penicillin                         | 0.5         | intermediate                  |
|                              |           |                      |                    | Cefotaxime                         | 0.12        | susceptible                   |
|                              |           |                      |                    | Clarithromycin                     | 0.12        | susceptible                   |
|                              |           |                      |                    | Clindamycin                        | 0.12        | susceptible                   |
|                              |           |                      |                    | Tetracycline                       | 0.5         | susceptible                   |
|                              |           |                      |                    | Telithromycin                      | 0.03        | susceptible                   |
|                              |           |                      |                    | Levofloxacin                       | 1           | susceptible                   |
|                              |           |                      |                    | Moxifloxacin                       | 0.12        | susceptible                   |
|                              |           |                      |                    | Chloramphenicol                    | 4           | susceptible                   |
|                              |           |                      |                    | Trimethoprim/<br>Sulfamethoxazole* | 4           | resistant                     |
|                              |           |                      |                    | Vancomycin                         | 0.5         | susceptible                   |
| Sp61<br>(NRZ:336<br>4/39533) | 19A       | pleuritis            | thorax<br>drainage | Oxacillin <sup>#</sup>             | -           | resistant                     |
|                              |           |                      |                    | Penicillin                         | 4           | resistant                     |
|                              |           |                      |                    | Cefotaxime                         | 1           | intermediate                  |
|                              |           |                      |                    | Clarithromycin                     | 16          | resistant                     |
|                              |           |                      |                    | Clindamycin                        | 16          | resistant                     |
|                              |           |                      |                    | Tetracycline                       | 16          | resistant                     |
|                              |           |                      |                    | Telithromycin                      | 0.25        | intermediate                  |
|                              |           |                      |                    | Levofloxacin                       | 1           | susceptible                   |
|                              |           |                      |                    | Moxifloxacin                       | 0.25        | susceptible                   |
|                              |           |                      |                    | Chloramphenicol                    | 4           | susceptible                   |
|                              |           |                      |                    | Trimethoprim/<br>Sulfamethoxazole* | 8           | resistant                     |
|                              |           |                      |                    | Vancomycin                         | 0.5         | susceptible                   |
| Sp64<br>(NRZ:306<br>6/35051) | 19A       | -                    | swab               | Oxacillin <sup>#</sup>             | -           | resistant                     |
|                              |           |                      |                    | Penicillin                         | 4           | resistant                     |
|                              |           |                      |                    | Cefotaxime                         | 2           | resistant                     |
|                              |           |                      |                    | Clarithromycin                     | 16          | resistant                     |



|                                    |      |             |
|------------------------------------|------|-------------|
| Clindamycin                        | 16   | resistant   |
| Tetracycline                       | 16   | resistant   |
| Telithromycin                      | 0.06 | susceptible |
| Levofloxacin                       | 1    | susceptible |
| Moxifloxacin                       | 0.25 | susceptible |
| Chloramphenicol                    | 4    | susceptible |
| Trimethoprim/<br>Sulfamethoxazole* | 8    | resistant   |
| Vancomycin                         | 0.5  | susceptible |

<sup>a</sup> Clinical and Laboratory Standards Institute, Performance Standards for Antimicrobial

Susceptibility Testing;

Twenty-Fourth Informational Supplement. CLSI document M100-S24, 2014.

<sup>b</sup> British Society for Antimicrobial Chemotherapy, Methods for Antimicrobial Susceptibility Testing, v.12, 2013.

<sup>#</sup> Susceptibility to oxacillin tested by oxacillin (1 µg) disc assay. Resistant = inhibition zone diameter ≤10 mm.

\* The MIC is based on the concentration of trimethoprim (in a combination of 1:19 with sulfamethoxazole).

### Supplementary Table S2. Overview of used oligonucleotides.

| Primer        | Sequence (5'→3') <sup>a</sup>                                        | Use                | Restriction sites; Reference |
|---------------|----------------------------------------------------------------------|--------------------|------------------------------|
| stkp_up_fwd   | CAGTCAATTTTCGCAAGATATCGG<br>ATTAGGAAGGAACTGACACATGG                  | $\Delta sp_{1732}$ | This work                    |
| stkp_up_rev   | AAAGGCCGGCCTAGACATCCGCC<br>ATACCTCCTCGACCAATCTGT                     | $\Delta sp_{1732}$ | <i>FseI</i> ; this work      |
| stkp_down_fwd | AAAGGCGCGCCGTAGTGCAGAAG<br>GCATGGTTGTTGAACAAAGTCCT<br>AGAGC          | $\Delta sp_{1732}$ | <i>AscI</i> ; this work      |
| stkp_down_rev | CGGCATGACCGCACCAGCTATAA<br>TCAAATCTGC                                | $\Delta sp_{1732}$ | This work                    |
| cysR_up_fwd   | CGGAGTTCTTTTCTTAGCGGTCAT<br>CTATCTACTGGTTTTTGCAGG                    | $\Delta sp_{0927}$ | This work                    |
| cysR_up_rev   | AAAGGCCGGCCGAACAGAAATAG<br>ACAGACTCGGCTGACTAACATAC<br>ATCTTTTCAGCAGC | $\Delta sp_{0927}$ | <i>FseI</i> ; this work      |
| cysR_down_fwd | AAAGGCGCGCCGCATGGTCTATG<br>TTAAACGTGAAGAAGTGGAGCTT                   | $\Delta sp_{0927}$ | <i>AscI</i> ; this work      |

|                      |                                                               |                                                                  |                         |
|----------------------|---------------------------------------------------------------|------------------------------------------------------------------|-------------------------|
|                      | AGTCAAGC                                                      |                                                                  |                         |
| cysR_down_rev        | CCAGCACTCGGGTGCACAACCAT<br>TCC                                | $\Delta sp_{0927}$                                               | This work               |
| sp_0119_up_fwd       | TAAGGTGACCGTTCATGTCAAAG<br>GAGAAAAGACAGAGG                    | $\Delta sp_{0119}/\Delta sp_{0119-sp_{0120}}$                    | This work               |
| sp_0119_up_rev       | AAAGGCCGGCCGGTAACTAGAAG<br>CTTGTGATTTTGGACAATCAAGGC<br>TGTAGC | $\Delta sp_{0119}/\Delta sp_{0119-sp_{0120}}$                    | <i>FseI</i> ; this work |
| sp_0119_down_f<br>wd | AAAGGCGCGCCAGCTAGTTCCAG<br>TCTTTTAAAAACAGCCCTACCAG<br>ATTGG   | $\Delta sp_{0119}$                                               | <i>AscI</i> ; this work |
| sp_0119_down_r<br>ev | CGGTGGAGGTTGTTTTGGATAATC<br>TCATGACTGGTACC                    | $\Delta sp_{0119}$                                               | This work               |
| sp_0120_up_fwd       | TAAGGTGACCGTTCATGTCAAAG<br>GAGAAAAGACAGAGG                    | $\Delta sp_{0120}$                                               | This work               |
| sp_0120_up_rev       | AAAGGCCGGCCCTAGCGGCCAAG<br>GAAGCCTCAACC                       | $\Delta sp_{0120}$                                               | <i>FseI</i> ; this work |
| sp_0120_down_f<br>wd | AAAGGCGCGCCATCAATCCAGAA<br>ACCATCGGCCAAGCC                    | $\Delta sp_{0119}/\Delta sp_{0119-sp_{0120}}$                    | <i>AscI</i> ; this work |
| sp_0120_down_r<br>ev | CAGCTCGTATCGCAGGTCATTTCA<br>ACGC                              | $\Delta sp_{0119}/\Delta sp_{0119-sp_{0120}}$                    | This work               |
| ermR_fwd             | <u>GGCGCGCCCCGGGCCCAAATTT</u><br>GTTTGAT                      | Amplification<br>of <i>erm<sup>R</sup></i>                       | <i>AscI</i> ;<br>2      |
| ermR_rev             | <u>GGCCGGCCAGTCGGCAGC</u><br>GACTCATAGAAT                     | Amplification<br>of <i>erm<sup>R</sup></i>                       | <i>FseI</i> ;<br>2      |
| mRNAcon_fwd          | TAAGGTGACCGTTCATGTCAAAG<br>GAGAAAAGACAGAGG                    | Test for DNA<br>contamination<br>in RNA<br>extracts (>200<br>nt) | This work               |
| mRNAcon_rev          | CAGCTCGTATCGCAGGTCATTTCA                                      | Test for DNA                                                     | This work               |

|             |                                   |                                                                  |           |
|-------------|-----------------------------------|------------------------------------------------------------------|-----------|
|             | ACGC                              | contamination<br>in RNA<br>extracts (>200<br>nt)                 |           |
| sRNAcon_fwd | TGCTGGTATTGCCCAAGTTCCTTA<br>TGTGG | Test for DNA<br>contamination<br>in RNA<br>extracts (≤200<br>nt) | This work |
| sRNAcon_rev | CCGACACTAGACCCCATGTTTGA<br>CGG    | Test for DNA<br>contamination<br>in RNA<br>extracts (≤200<br>nt) | This work |

---

<sup>a</sup> Restriction sites are shown italicized and are underlined.

## Supplementary Methods

### Isolation and enrichment of mRNA.

At each of the assessed time-points (0, 5, 15, 60, 120, 180 min), 5 ml culture of Carolacton-treated and control cultures were taken from two duplicate cultures (100 ml) of *S. pneumoniae* TIGR4, diluted in an equal volume RNAprotect Bacterial Reagent (Qiagen), incubated at RT for 5 min, harvested by centrifugation and the resulting pellet stored at -80°C. Total RNA from was isolated using the miRNeasy mini kit (Qiagen) according to the manufacturer's instructions for separation of small RNA-enriched fractions (≤200 nt) and larger transcripts (>200 nt). Briefly, cells were washed with RNase-free water, resuspended in QIAzol lysis reagent and homogenized by vigorous vortexing for 3 min after addition of 50 mg acid-washed glass beads (diameter 100 μm). After phase separation by addition of chloroform, the aqueous phase was mixed with an equal volume of 70% (v/v) ethanol and loaded onto an RNeasy mini spin column. The flow-through was then used for enrichment of small RNAs with the RNeasy MiniElute kit (Qiagen).

The fraction containing large transcripts was isolated from the remaining RNeasy mini spin column. DNA contaminations within these fractions were removed by addition of 27 Kunitz units DNase I (RNase-Free DNase Set, Qiagen) per sample and incubation at RT for 45 min. Purification of the DNase I digestion mix was achieved with RNeasy mini spin columns (Qiagen), using the standard purification procedure described in the manual. Absence of DNA was confirmed by PCR with the primer pairs mRNAcon\_fwd/mRNAcon\_rev, or sRNAcon\_fwd/sRNAcon\_rev, respectively. Removal of ribosomal RNA in the >200 nt fraction was carried out with the Ribo-Zero rRNA Removal Kit for Gram-positive Bacteria (epicentre). Overall RNA integrity and absence of large cellular RNAs (ribosomal and >200 nt) in the samples containing small transcripts ( $\leq 200$  nt) was confirmed by analysis with the Agilent 2100 BioAnalyzer using Agilent RNA 6000 Chips (Agilent Technologies). DNA library generation was carried out using the ScriptSeq™ v2 RNA-Seq Library Preparation Kit (epicentre) for long transcripts (>200 nt), and the TruSeq Small RNA Library Prep Kit (Illumina) for transcripts  $\leq 200$  nt. Libraries were sequenced on the Illumina HiSeq 2500 (Illumina) using 50-bp single-end sequencing.

### **RNA-seq data analysis.**

First, trimming of Illumina sequencing adapter sequences of all obtained reads was done using fastq-mcf<sup>3</sup>. All sequenced libraries containing mRNAs >200 nt and mRNAs  $\leq 200$  nt/tRNAs were then individually mapped to the *S. pneumoniae* TIGR4 genome (NC\_003028.3) using Rockhopper (v2.0.3)<sup>4</sup>. The location of genes shorter 200 nt, encoded within polycistronic transcripts longer 200 nt, was also taken into account. Information about operon structures within the TIGR4 genome was obtained from the Database of prokaryotic OpeRons 2 (DOOR 2,<sup>5</sup>). For the analysis of differential expression of pneumococcal small regulatory RNAs ( $\leq 200$  nt and

>200 nt), all reads were again mapped to the reference genome using Bowtie2 (v2.2.2)<sup>6</sup>. Afterwards, custom-made \*.gff-files, containing locus and strand information of previously identified small RNAs ( $\leq$ / $>$ 200 nt) in *S. pneumoniae* TIGR4<sup>7-11</sup> were used to count the mapped reads per small RNA via HTSeq (v0.6.0)<sup>12</sup>. Additionally, known small RNAs from other bacterial species that can be mapped to the TIGR4 genome by sequence similarity were obtained from the Bacterial Small Regulatory RNA Database (BSRD)<sup>13</sup> and included in the analysis. All analysed small RNAs are documented in Supplementary Dataset S3. Differential expression of transcripts was then calculated using the bioconductor edgeR (v3.1) package for R (v3.10.0)<sup>14</sup>. For differential analysis, the raw read counts obtained by Rockhopper or HTSeq were used. EdgeR utilizes negative binomial distribution for calculation of differential expression and is therefore considered most accurate when it comes to modelling variations in read counts between few biological replicates only<sup>15</sup>. False discovery rate (FDR)-adjusted P values were calculated according to<sup>16</sup>. FDR values of  $<0.01$  were considered significant. For visualization of these results heat maps were generated, taking into account only genes that, in addition to a significant FDR, showed a  $\log_2$ -fold change ( $\log_2$ FC) of transcription of  $\geq \pm 2$  (or  $\geq \pm 0.8$  for small RNAs) at least at one point during a time course. For this, the  $\log_2$ -fold values of transcript abundance obtained in edgeR were used in combination with the heatmap.2 function of the R package gplots (v2.15.0)<sup>17</sup>. Raw and processed RNA-seq data have been deposited in NCBI's Gene Expression Omnibus (GEO) database<sup>18</sup> and are accessible through GEO Series accession number GSE76979.

### **Flow cytometric analysis of fluorescently-labelled *S. pneumoniae* cells.**

Fluorescently stained cells were analysed in triplicate on a FACSCanto flow cytometer (BD Biosciences). DiOC<sub>2</sub>(3) was excited with a blue laser at 488 nm. DiOC<sub>2</sub>(3)-emitted green fluorescence (FL1) was detected through a 530 nm, 30 nm bandwidth band-pass filter, and its red

fluorescence (FL2) was detected by using a 570 nm long-pass dichroic filter and a 610 nm, 20 nm bandwidth band-pass filter. The trigger was set on the forward scatter (FSC) channel. Changes in the membrane potential were calculated using a cell size independent ratiometric technique as described previously<sup>19</sup>. Excitation of Syto 9/PI-stained cells was carried out at 488 nm. Green fluorescence emitted by Syto 9 (FL1) was detected through a 530 nm, 30 nm bandwidth band-pass filter. Red fluorescence emitted by PI (FL3) was detected through a 635 nm long-pass dichroic filter and a 670 nm long-pass filter. The trigger was set for the green fluorescence channel FL1. Identification of live and dead bacterial populations and quantification were carried out as described in the manufacturer's manual for the *BacLight* Bacterial Viability Kit. A standard curve of Syto 9/PI-stained cells was prepared by mixing heat-killed and exponentially growing cells at different proportions before staining. Samples were always analysed immediately after staining. Before conducting the measurements, the instrument settings were optimized by using unstained and single-stained controls. 100,000 events were recorded for each sample; the sample analysis rate was adjusted to less than 3,000 events/s. Results were analysed using FlowJo (v10.0.7) single cell analysis software (Tree Star Inc., Ashland, USA) and the free analysis software Flowing Software (v2.5.1) (created by Perttu Terho, Cell Imaging Core, Turku Centre for Biotechnology, Finland, <http://www.flowingsoftware.com/>).

## References.

- 1 Reck, M. *et al.* The biofilm inhibitor carolacton disturbs membrane integrity and cell division of *Streptococcus mutans* through the serine/threonine protein kinase PknB. *J Bacteriol* **193**, 5692-5706, doi:10.1128/JB.05424-11 (2011).
- 2 Lévesque, C. M. *et al.* Involvement of Sortase Anchoring of Cell Wall Proteins in Biofilm Formation by *Streptococcus mutans*. *Infect. Immun* **73**, 3773-3777, doi:10.1128/IAI.73.6.3773-3777.2005 (2005).
- 3 Aronesty, E. Comparison of sequencing utility programs. *Open Bioinforma J* **7**, 1-8, doi:10.2174/1875036201307010001 (2013).
- 4 Tjaden, B. De novo assembly of bacterial transcriptomes from RNA-seq data. *Genome Biology* **16**, doi:10.1186/s13059-014-0572-2 (2015).
- 5 Mao, X. *et al.* DOOR 2.0: presenting operons and their functions through dynamic and integrated views. *Nucleic Acids Res* **42**, 654-659, doi:10.1093/nar/gkt1048 (2014).
- 6 Langmead, B. & Salzberg, S. L. Fast gapped-read alignment with Bowtie 2. *Nat Methods* **9**, 357-359, doi:10.1038/nmeth.1923 (2012).
- 7 Acebo, P., Martin-Galiano, A. J., Navarro, S., Zaballos, A. & Amblar, M. Identification of 88 regulatory small RNAs in the TIGR4 strain of the human pathogen *Streptococcus pneumoniae*. *RNA* **18**, 530-546, doi:10.1261/rna.027359.111 (2012).
- 8 Halfmann, A., Kovacs, M., Hakenbeck, R. & Bruckner, R. Identification of the genes directly controlled by the response regulator CiaR in *Streptococcus pneumoniae*: five out of 15 promoters drive expression of small non-coding RNAs. *Mol Microbiol* **66**, 110-126, doi:10.1111/j.1365-2958.2007.05900.x (2007).
- 9 Kumar, R. *et al.* Identification of novel non-coding small RNAs from *Streptococcus pneumoniae* TIGR4 using high-resolution genome tiling arrays. *BMC Genomics* **11**, 350, doi:10.1186/1471-2164-11-350 (2010).
- 10 Mann, B. *et al.* Control of virulence by small RNAs in *Streptococcus pneumoniae*. *PLoS Pathog* **8**, e1002788, doi:10.1371/journal.ppat.1002788 (2012).
- 11 Livny, J., Brencic, A., Lory, S. & Waldor, M. K. Identification of 17 *Pseudomonas aeruginosa* sRNAs and prediction of sRNA-encoding genes in 10 diverse pathogens using the bioinformatic tool sRNAPredict2. *Nucleic Acids Res* **34**, 3484-3493, doi:10.1093/nar/gkl453 (2006).
- 12 Anders, S., Pyl, P. T. & Huber, W. HTSeq--a Python framework to work with high-throughput sequencing data. *Bioinformatics* **31**, 166-169, doi:10.1093/bioinformatics/btu638 (2015).

- 13 Li, L. *et al.* BSRD: a repository for bacterial small regulatory RNA. *Nucleic Acids Res* **41**, 233-238, doi:10.1093/nar/gks1264 (2013).
- 14 Robinson, M. D., McCarthy, D. J. & Smyth, G. K. edgeR: a Bioconductor package for differential expression analysis of digital gene expression data. *Bioinformatics* **26**, 139-140, doi:10.1093/bioinformatics/btp616 (2010).
- 15 McCarthy, D. J., Chen, Y. & Smyth, G. K. Differential expression analysis of multifactor RNA-Seq experiments with respect to biological variation. *Nucleic Acids Res* **40**, 4288-4297, doi:10.1093/nar/gks042 (2012).
- 16 Benjamini, Y. & Hochberg, Y. Controlling the False Discovery Rate: A Practical and Powerful Approach to Multiple Testing. *Journal of the Royal Statistical Society. Series B (Methodological)* **57**, 289-300, doi:10.2307/2346101 (1995).
- 17 Warnes, G. R. *et al.* gplots: Various R programming tools for plotting data. R package version 2.12. 1 (2013).
- 18 Edgar, R., Domrachev, M. & Lash, A. E. Gene Expression Omnibus: NCBI gene expression and hybridization array data repository. *Nucleic Acids Res* **30**, 207-210, doi:10.1093/nar/30.1.207 (2002).
- 19 Novo, D., Perlmutter, N. G., Hunt, R. H. & Shapiro, H. M. Accurate flow cytometric membrane potential measurement in bacteria using diethyloxycarbocyanine and a ratiometric technique. *Cytometry* **35**, 55-63, doi:10.1002/(sici)1097-0320(19990101)35:1<55::aid-cyto8>3.0.co;2-2 (1999).
